# Supplementary material for: Efficacy of Polygonatum sibiricum on Mild Insomnia: A Randomized Placebo-Controlled Trial
Source: PubMed Central journal article supplement (PMC6723095; doi:10.3390/nu11081719), 2019-07-25
Supplement: nutrients-11-01719-s001.pdf [file nutrients-11-01719-s001.pdf]

Supplementary Table S1. Nutritional Value of *Polygonatum sibiricum* Extract

| Ingredient   | Amount of ingredient per tablet |
|--------------|---------------------------------|
| Carbohydrate | 432.6 mg                        |
| Sugar        | 39.9 mg                         |
| Protein      | 50.4 mg                         |
| Lipid        | 0.1 mg                          |
| Fiber        | 31.8 mg                         |
| Ash content  | 16.7 mg                         |

Supplementary Table S2. List of ingredients per each *Polygonatum sibiricum* tablet

| Ingredients                          | Amount   |
|--------------------------------------|----------|
| Polygonatum sibiricum extract        | 500.0 mg |
| Microcrystalline cellulose           | 88.0 mg  |
| Maltodextrin                         | 40.0 mg  |
| Powdered milk mixture                | 128.8 mg |
| Magnesium stearate                   | 9.9 mg   |
| Hydroxypropyl methylcellulose (HPMC) | 20.8 mg  |
| Glycerol fatty acid esters           | 2.1 mg   |
| Titanium dioxide                     | 8.0 mg   |
| Gardenia yellow                      | 2.4 mg   |
| Total                                | 800.0 mg |

Supplementary Table S3. Cluster information of differences in changes of perfusion between Placebo and PS groups

| Brain regions                   | Cluster size (mm <sup>3</sup> ) | Maximum <i>t</i> value | MNI atlas coordinate                  |          |          |
|---------------------------------|---------------------------------|------------------------|---------------------------------------|----------|----------|
|                                 |                                 |                        | (location of maximum <i>t</i> -value) |          |          |
|                                 |                                 |                        | <i>x</i>                              | <i>y</i> | <i>z</i> |
| <i>Default Mode Network</i>     |                                 |                        |                                       |          |          |
| Medial prefrontal cortex, right | 560                             | 3.2                    | 44                                    | 80       | 38       |

Supplementary Table S4. Laboratory data of serum as safety measures

|                                                | Placebo ( <i>n</i> = 39) | PS group ( <i>n</i> = 40) | All ( <i>n</i> = 79) |
|------------------------------------------------|--------------------------|---------------------------|----------------------|
| Absolute neutrophil count (10 <sup>9</sup> /L) |                          |                           |                      |
| Baseline                                       | 3.29 (1.15)              | 3.04 (1.37)               | 3.16 (1.26)          |
| Follow-up                                      | 3.32 (1.24)              | 3.20 (1.25)               | 3.25 (1.24)          |
| Hemoglobin (g/L)                               |                          |                           |                      |
| Baseline                                       | 141 (12)                 | 141 (13)                  | 141 (12)             |
| Follow-up                                      | 140 (14)                 | 139 (13)                  | 139 (13)             |
| Hematocrit (Proportion of 1.0)                 |                          |                           |                      |
| Baseline                                       | 0.42 (0.04)              | 0.42 (0.04)               | 0.42 (0.04)          |
| Follow-up                                      | 0.42 (0.04)              | 0.42 (0.04)               | 0.42 (0.04)          |
| Platelet (10 <sup>9</sup> /L)                  |                          |                           |                      |
| Baseline                                       | 254 (54.5)               | 251 (69.8)                | 252 (62.3)           |
| Follow-up                                      | 258 (57.4)               | 252 (76.4)                | 255 (67.6)           |
| Serum creatinine (μmol/L)                      |                          |                           |                      |
| Baseline                                       | 72.5 (17.7)              | 72.5 (17.7)               | 72.5 (17.7)          |
| Follow-up                                      | 70.7 (17.7)              | 70.7 (17.7)               | 70.7 (17.7)          |
| Serum BUN (mmol/L)                             |                          |                           |                      |
| Baseline                                       | 4.68 (1.36)              | 4.75 (1.36)               | 4.71 (1.36)          |
| Follow-up                                      | 4.50 (1.18)              | 4.71 (1.46)               | 4.61 (1.32)          |
| AST (μkat/L)                                   |                          |                           |                      |
| Baseline                                       | 0.31 (0.06)              | 0.32 (0.09)               | 0.32 (0.08)          |
| Follow-up                                      | 0.31 (0.09)              | 0.33 (0.10)               | 0.32 (0.09)          |
| ALT (μkat/L)                                   |                          |                           |                      |
| Baseline                                       | 0.28 (0.11)              | 0.28 (0.13)               | 0.28 (0.12)          |
| Follow-up                                      | 0.29 (0.15)              | 0.29 (0.16)               | 0.29 (0.15)          |
| Glucose (mmol/L)                               |                          |                           |                      |
| Baseline                                       | 5.13 (0.44)              | 5.18 (0.48)               | 5.16 (0.46)          |
| Follow-up                                      | 5.00 (0.56)              | 5.12 (0.69)               | 5.06 (0.63)          |
| Total Cholesterol (mmol/L)                     |                          |                           |                      |
| Baseline                                       | 4.95 (0.90)              | 4.58 (0.81)               | 4.77 (0.87)          |
| Follow-up                                      | 4.91 (0.84)              | 4.80 (1.40)               | 4.85 (1.16)          |
| BMI (kg/m <sup>2</sup> )                       |                          |                           |                      |
| Baseline                                       | 24.0 (3.2)               | 23.8 (3.2)                | 23.9 (3.2)           |

|           |            |            |            |
|-----------|------------|------------|------------|
| Follow-up | 23.7 (3.1) | 23.7 (3.4) | 23.7 (3.2) |
|-----------|------------|------------|------------|

Data are presented as mean (standard deviation). PS, *polygonatum sibiricum*; BUN, blood urea nitrogen; AST, aspartate transaminase; ALT, alanine aminotransferase; BMI, body mass index

Supplementary Figure S1. ROI mask for default mode network in the current study.

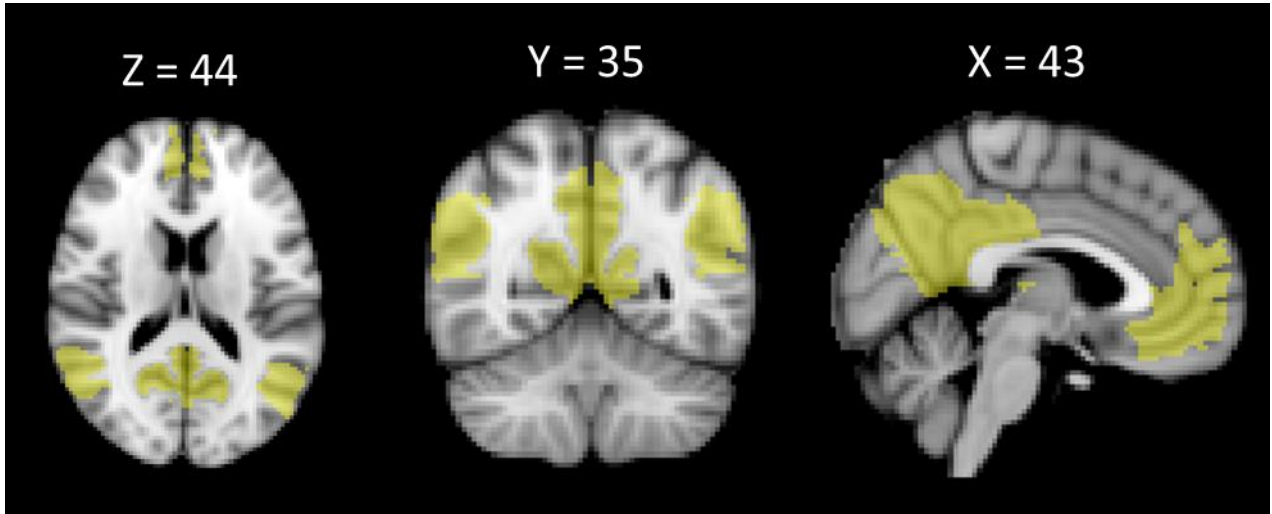

ROI masks for the DMN were generated with a threshold of  $z = 2.33$  ( $p = 0.01$ ), which included the bilateral mPFC, ACC, precuneus, PCC and IPL as described in previous research (Smith et al., 2009). The ROI masks for the DMN were non-linearly registered to the subject-specific gray matter mask from the T1-weighted images, which was thresholded at 60% tissue probability. ROI, region-of-interest; DMN, default mode network; mPFC, medial prefrontal cortex; PCC, posterior cingulate cortex; IPL, inferior parietal lobule
